# Supplementary material
Source: PubMed Central journal article supplement (PMC3172923)
Supplement: ejhg201140x2.pdf [file ejhg201140x2.pdf]

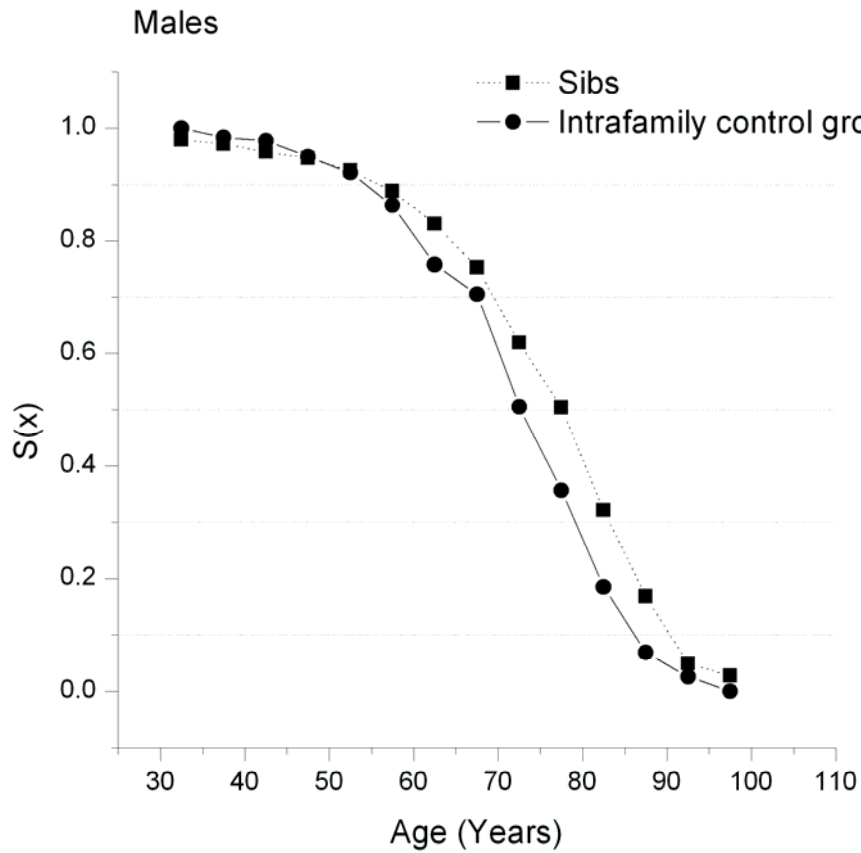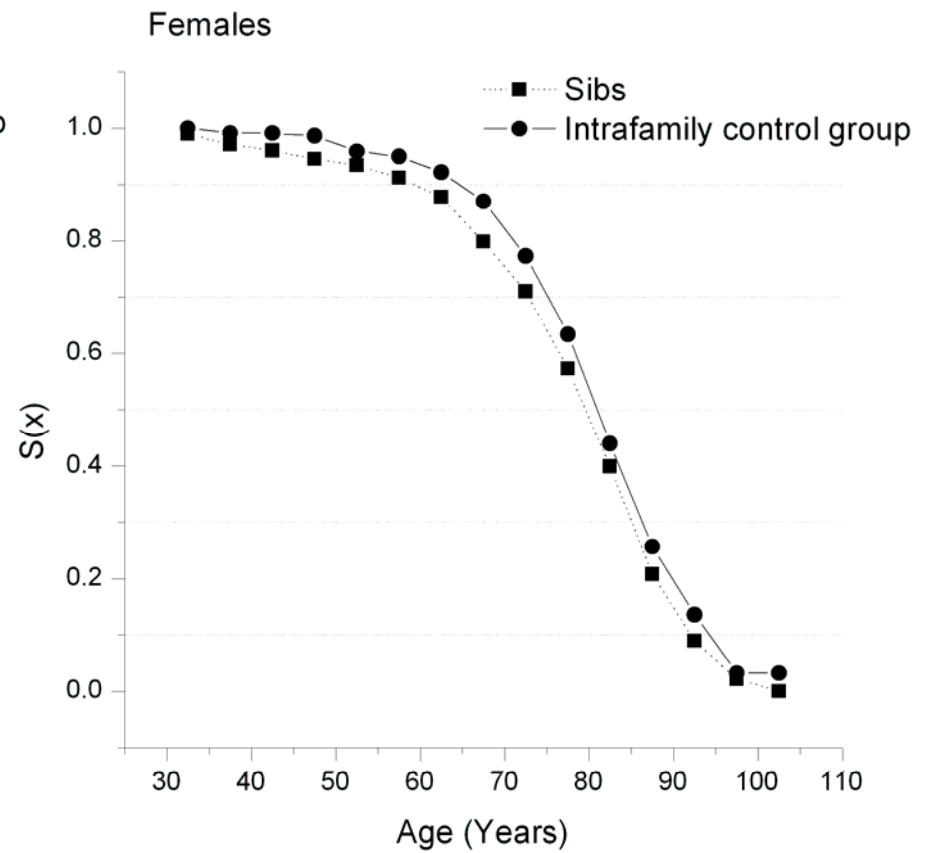

**Figure 2 Supplementary Material.** Survival probabilities from age 30 for siblings of female probands with respect to those of the relevant intrafamily control group.
